# Supplementary material for: Association of Cell Death Markers With Tumor Immune Cell Infiltrates After Chemo-Radiation in Cervical Cancer
Source: PubMed Central journal article supplement (PMC9316180; doi:10.3389/fonc.2022.892813), 2022-07-12
Supplement: DataSheet_1.pdf [file DataSheet_1.pdf]

**Supplemental Tables:**

**Overview of significant correlations**

| <b>Correlations cell death markers/DAMPs/TILs in biopsy samples – All patients</b>                         |                    | <b>p-value</b> | <b>Correlation coefficient</b> |
|------------------------------------------------------------------------------------------------------------|--------------------|----------------|--------------------------------|
| Cleaved caspase-3                                                                                          | CD3                | 0.0191         | -0.4058                        |
| Cleaved caspase-3                                                                                          | CD8                | 0.0187         | -0.4070                        |
| pMLKL                                                                                                      | CD163              | 0.0442         | -0.3526                        |
| pMLKL                                                                                                      | CD20               | 0.0205         | -0.4018                        |
| pMLKL                                                                                                      | CD3                | <0.001         | -0.5525                        |
| pMLKL                                                                                                      | CD8                | 0.0308         | -0.3764                        |
| pMLKL                                                                                                      | Cleaved caspase-3  | 0.0427         | 0.3550                         |
| Calreticulin                                                                                               | PD-L1 immune cells | 0.0038         | -0.4898                        |
| Calreticulin                                                                                               | Iba1               | 0.0375         | -0.3637                        |
| HMGB1                                                                                                      | Iba1               | 0.0066         | -0.4637                        |
| HMGB1                                                                                                      | Calreticulin       | 0.0019         | 0.5215                         |
| 4-HNE                                                                                                      | Cleaved caspase-3  | 0.0325         | 0.3731                         |
| <b>Correlations cell death markers/DAMPs/TILs in hysterectomy samples– All patients</b>                    |                    | <b>p-value</b> | <b>Correlation coefficient</b> |
| GPX4                                                                                                       | PD-L1 immune cells | 0.0108         | 0.8296                         |
| <b>Correlations cell death markers/DAMPs/TILs Treatment-induced levels – All patients</b>                  |                    | <b>p-value</b> | <b>Correlation coefficient</b> |
| Cleaved caspase-3                                                                                          | PD-L1 immune cells | 0.0475         | -0.3279                        |
| 4-HNE                                                                                                      | PD-L1 immune cells | 0.0173         | 0.3891                         |
| <b>Correlations cell death markers/DAMPs/TILs in biopsy samples vs hysterectomy samples – All Patients</b> |                    | <b>p-value</b> | <b>Correlation coefficient</b> |
| Pre-GPX4                                                                                                   | Post-Foxp3         | <0.001         | 0.5757                         |
| Pre-Calreticulin                                                                                           | Post-Calreticulin  | 0.0459         | 0.3612                         |
| Pre-Calreticulin                                                                                           | Post-HMGB1         | <0.001         | 0.6966                         |
| Pre-HMGB1                                                                                                  | Post-HMGB1         | 0.0014         | 0.5490                         |
| <b>Correlations cell death markers/DAMPs/TILs in hysterectomy samples – Incomplete response</b>            |                    | <b>p-value</b> | <b>Correlation coefficient</b> |
| pMLKL                                                                                                      | Iba1               | 0.0387         | 0.7328                         |
| <b>Correlations cell death markers/DAMPs/TILs Treatment-induced levels – Incomplete response</b>           |                    | <b>p-value</b> | <b>Correlation coefficient</b> |
| GPX4                                                                                                       | CD3                | 0.0367         | 0.4199                         |
| pMLKL                                                                                                      | CD3                | 0.0284         | -0.4384                        |
| 4-HNE                                                                                                      | CD20               | 0.0378         | -0.4117                        |
| 4-HNE                                                                                                      | FoxP3              | 0.0118         | -0.4951                        |
| 4-HNE                                                                                                      | pMLKL              | 0.0091         | 0.5108                         |

**Supplemental Table 1. An overview of the statically significant correlations between the cell death markers/DAMPs and the TILs. Significant correlations between the levels of the different cell**

death/ DAMPs measured in this study and the TILs<sup>3</sup> are shown in all patients in the biopsy samples, the treatment-induced levels (hysterectomy sample levels - biopsy sample levels), as well as the pre- vs. post-treatment (biopsy sample levels vs. hysterectomy sample levels). Patients with an incomplete response showing significant correlations between the cell death markers/DAMPs and the TILs are shown in hysterectomy sample and the treatment-induced levels (hysterectomy sample levels - biopsy sample levels). P-values and correlation coefficients are shown for each association. DAMPs = damage-associated molecular patterns; TILs = Tumor-infiltrating Leukocytes; pMLKL = phosphorylated mixed lineage kinase domain like pseudokinase; HMGB1 = High Mobility Group Box 1; 4-HNE = 4-hydroxynonenal; PD-L1 immune = programmed death-ligand 1 expressed on immune cells; GPX4 = glutathione peroxidase 4; Iba1 = ionized calcium binding adaptor molecule 1.

| <b>Association cell death markers/DAMPs/Age/FiGO/Lymph-node satus with Relapse or CSS in biopsy samples</b> |         | <b>p-value</b> | <b>p-value FDR corrected</b> |
|-------------------------------------------------------------------------------------------------------------|---------|----------------|------------------------------|
| pMLKL                                                                                                       | Relapse | 0,97669        | 0,98                         |
| Calreticulin                                                                                                | Relapse | 0,082          | 0,867                        |
| GPX4                                                                                                        | Relapse | 0,62476        | 0,948                        |
| Cleaved Caspase 3                                                                                           | Relapse | 0,8396         | 0,968                        |
| HMGB1                                                                                                       | Relapse | 0,44347        | 0,879                        |
| 4-HNE                                                                                                       | Relapse | 0,20865        | 0,867                        |
| Age                                                                                                         | Relapse | 0,40006        | 0,867                        |
| FIGO                                                                                                        | Relapse | 0,51117        | 0,928                        |
| Lymph-node status                                                                                           | Relapse | 0,10469        | 0,868                        |
| pMLKL                                                                                                       | CSS     | 0,973          | 0,98                         |
| Calreticulin                                                                                                | CSS     | 0,1467         | 0,867                        |
| GPX4                                                                                                        | CSS     | 0,1909         | 0,867                        |
| Cleaved Caspase 3                                                                                           | CSS     | 0,7365         | 0,948                        |
| HMGB1                                                                                                       | CSS     | 0,4559         | 0,879                        |
| 4-HNE                                                                                                       | CSS     | 0,9602         | 0,98                         |
| Age                                                                                                         | CSS     | 0,8425         | 0,968                        |
| FIGO                                                                                                        | CSS     | 0,2054         | 0,867                        |
| Lymph-node status                                                                                           | CSS     | 0,3838         | 0,867                        |

| <b>Association cell death markers/DAMPs/Age/FiGO/Lymph-node satus with Relapse or CSS in hysterectomy samples</b> |         | <b>p-value</b>  | <b>p-value FDR corrected</b> |
|-------------------------------------------------------------------------------------------------------------------|---------|-----------------|------------------------------|
| pMLKL                                                                                                             | Relapse | 0,7346          | 0,9482                       |
| Calreticulin                                                                                                      | Relapse | 0,421           | 0,874                        |
| GPX4                                                                                                              | Relapse | 0,3118          | 0,867                        |
| Cleaved Caspase 3                                                                                                 | Relapse | 0,3681          | 0,867                        |
| HMGB1                                                                                                             | Relapse | 0,3805          | 0,867                        |
| 4-HNE                                                                                                             | Relapse | 0,9189          | 0,979                        |
| Age                                                                                                               | Relapse | 0,5734          | 0,938                        |
| FIGO                                                                                                              | Relapse | 0,1978          | 0,867                        |
| Lymph-node status                                                                                                 | Relapse | 0,3371          | 0,867                        |
| pMLKL                                                                                                             | CSS     | <b>0,02687*</b> | 0,867                        |
| Calreticulin                                                                                                      | CSS     | 0,40155         | 0,867                        |
| GPX4                                                                                                              | CSS     | 0,81961         | 0,968                        |
| Cleaved Caspase 3                                                                                                 | CSS     | 0,67561         | 0,948                        |
| HMGB1                                                                                                             | CSS     | 0,38296         | 0,866                        |
| 4-HNE                                                                                                             | CSS     | 0,70889         | 0,948                        |
| Age                                                                                                               | CSS     | 0,6747          | 0,948                        |
| FIGO                                                                                                              | CSS     | 0,22307         | 0,868                        |
| Lymph-node status                                                                                                 | CSS     | 0,64231         | 0,948                        |

| <b>Association cell death markers/DAMPs/Age/FiGO/Lymph-node satus with Relapse or CSS – Treatment-induced levels</b> |         | <b>p-value</b> | <b>p-value FDR corrected</b> |
|----------------------------------------------------------------------------------------------------------------------|---------|----------------|------------------------------|
| pMLKL                                                                                                                | Relapse | 0,9797         | 0,98                         |
| Calreticulin                                                                                                         | Relapse | 0,1513         | 0,867                        |
| GPX4                                                                                                                 | Relapse | 0,7756         | 0,952                        |
| Cleaved Caspase 3                                                                                                    | Relapse | 0,355          | 0,867                        |
| HMGB1                                                                                                                | Relapse | 0,2501         | 0,867                        |
| 4-HNE                                                                                                                | Relapse | 0,9625         | 0,979                        |
| Age                                                                                                                  | Relapse | 0,6591         | 0,948                        |

|                   |         |        |       |
|-------------------|---------|--------|-------|
| FIGO              | Relapse | 0,1928 | 0,867 |
| Lymph-node status | Relapse | 0,1251 | 0,867 |
| pMLKL             | CSS     | 0,3469 | 0,867 |
| Calreticulin      | CSS     | 0,39   | 0,867 |
| GPX4              | CSS     | 0,5645 | 0,938 |
| Cleaved Caspase 3 | CSS     | 0,5154 | 0,928 |
| HMGB1             | CSS     | 0,768  | 0,952 |
| 4-HNE             | CSS     | 0,7375 | 0,948 |
| Age               | CSS     | 0,878  | 0,98  |
| FIGO              | CSS     | 0,2253 | 0,867 |
| Lymph-node status | CSS     | 0,5577 | 0,938 |

**Supplemental Table 2. Association between cell death markers, DAMPs, Age, FIGO, Lymph-node status with Relapse or CSS.** Association between the cell death markers, DAMPs, Age, FIGO and lymph-node status with Relapse or CSS are shown in the biopsy samples (pre-treatment), the hysterectomies (post-treatment) and the treatment-induced levels (hysterectomy sample levels - biopsy sample levels). P-values and p-values FDR-corrected are shown for each association. DAMPs = damage-associated molecular patterns; pMLKL = phosphorylated mixed lineage kinase domain like pseudokinase; HMGB1 = High Mobility Group Box 1; 4-HNE = 4-hydroxynonenal; GPX4 = glutathione peroxidase 4; FIGO = (International Federation of Obstetrics and Gynecology).

**Supplemental Figure:**

**Pre-treatment (biopsy samples)**

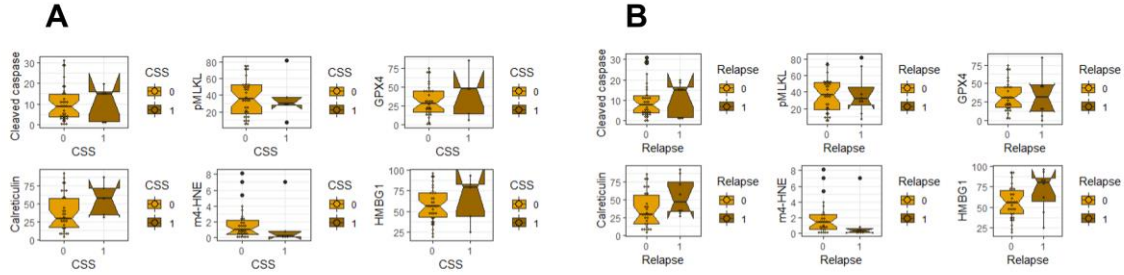

**Post-treatment (hysterectomy samples)**

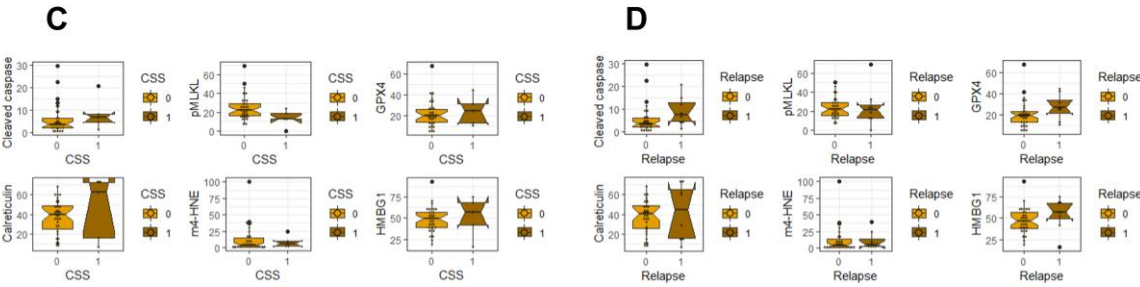

**Treatment-induced (levels hysterectomy sample – levels biopsy sample)**

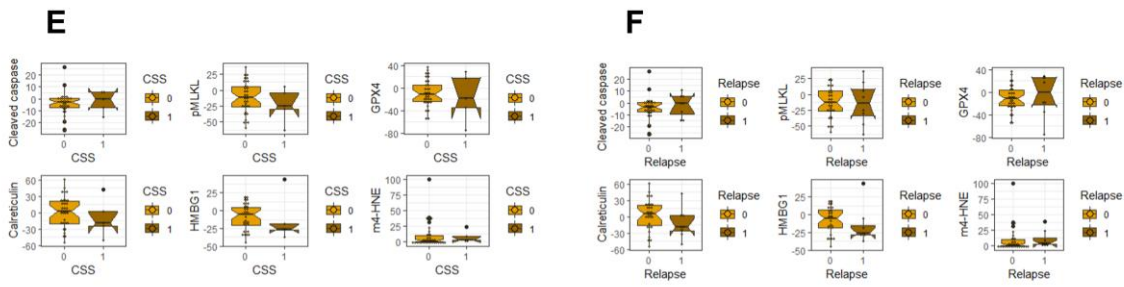

**Supplemental figure 1. Notched boxplots representing ICD markers in relation to the outcome of the patients.** All illustrative representations are shown pre-treatment (biopsy samples; panels A, B), post-treatment (hysterectomy samples; panels C, D), and treatment-induced (levels hysterectomy samples - levels biopsy samples; panels E, F). Cell death parameters (cleaved caspase-3, pMLKL, GPX4, Calreticulin, 4-HNE, HMGB1) are compared in function of the outcome of the patients: Cancer Specific Survival (CSS) (0, 1; panels A, C, E) and Relapse (0, 1; panels B, D, F). The x-axis represents the outcome of the patient with “0” in case of no CSS and no Relapse, and “1” in case of CSS and Relapse. The y-axis represents the quantitative data of the cell death parameters as indicated based on staining of samples from 38 patients pre-treatment (biopsy samples; panels A, B) and post-treatment (hysterectomy samples; panels C, D). The panels E, F illustrate the difference between post- and pre-treatment. The confidence interval for each box is shown on the median value, and indicated as a notch.

In some cases (Calreticulin pre- and post-treatment CSS and Relapse, HMGB1 pre- and post-treatment CSS and Relapse) the notches do not overlap, indicating a potential effect or trend between the groups. This could however not be verified as no statistical significance was noticed using GMM (binomial family) analysis.
